# Supplementary material for: Metabolomic profiling identifies novel biomarkers and mechanisms in human bladder cancer treated with submucosal injection of gemcitabine
Source: PubMed Central journal article supplement — Int J Mol Med. 2019 Sep 23;44(5):1952–62. doi: 10.3892/ijmm.2019.4347 (PMC6777689; doi:10.3892/ijmm.2019.4347), 2019-09-23
Supplement: Supplementary_Data.pdf [file Supplementary_Data.pdf]

Table S1. Correlations between metabolite changes and cancer stage.

| Metabolites | Fold change <sup>a,d</sup> | P-value <sup>d</sup> | Fold change <sup>a,e</sup> | P-value <sup>e</sup> | Fold change <sup>b,d</sup> | P-value <sup>d</sup> | Fold change <sup>b,e</sup> | P-value <sup>e</sup> | Fold change <sup>c,d</sup> | P-value <sup>d</sup> | Fold change <sup>c,e</sup> | P-value <sup>e</sup> |
|-------------|----------------------------|----------------------|----------------------------|----------------------|----------------------------|----------------------|----------------------------|----------------------|----------------------------|----------------------|----------------------------|----------------------|
| Bilirubin   | 0.2                        | 4.15E-02             | 0.42                       | 1.68E-01             | 10.19                      | 5.40E-01             | 0.77                       | 1.68E-01             | -                          | -                    | -                          | -                    |
| Retinal     | 0.02                       | 4.76E-01             | 0.47                       | 4.98E-02             | 0.07                       | 5.01E-01             | 1.52                       | 3.22E-01             | -                          | -                    | -                          | -                    |
| Histamine   | 4.59                       | 2.60E-01             | 0.37                       | 4.61E-03             | -                          | -                    | -                          | -                    | 9.7                        | 3.71E-02             | 2.06                       | 3.55E-03             |
| Thiamine    | 0.39                       | 8.39E-02             | 0.31                       | 4.13E-04             | -                          | -                    | -                          | -                    | 0.71                       | 4.09E-01             | 0.63                       | 4.11E-02             |

<sup>a</sup>Pre-gemcitabine BCa tissues/pre-gemcitabine normal tissues. <sup>b</sup>Post-gemcitabine BCa tissues/pre-gemcitabine normal tissues. <sup>c</sup>Post-gemcitabine normal tissues/pre-gemcitabine normal tissues. <sup>d</sup>Ta/TI stage. <sup>e</sup>T2 stage. BCa, bladder cancer.
